# Supplementary material
Source: publisher figshare collection journal article supplement (https://gsapubs.figshare.com/articles/dataset/_/19684242)
Supplement: Supplementary file 1 [file 1]

## Sheet: ET 5-18Ma.txt
Age (ka)	ET	ET+0.3P	ET tiepoint	ET+0.3 tiepoint	U1338 (mcd, Holbourn et al., 2014)	U1338 d13C	U1338 d13C 3pt smooth	U1338 d18O	U1338 d18O 3pt smooth
12724	0.45932	0.47414		127a	331.92	0.47475	0.535663	2.018	2.11761
12731	0.46376	0.45496	ET127a			0.602	0.590666	2.268	2.2347
12745	0.45221	0.46765		127b		0.70625	0.66125	2.1345	2.19192
12759	0.45493	0.44566	ET127b			0.733333	0.732223	2.22667	2.20557
12766	0.45062	0.46189		127c	332.72	0.79525	0.756281	2.1225	2.21945
12815	0.45372	0.46598	ET128a			0.563333	0.57667	2.09333	2.12663
12817	0.45348	0.46673		128a	334.53	0.563333	0.586392	2.05792	2.11428
12839	0.45844	0.47304		128b		0.306667	0.371113	2.28667	2.2322
12848	0.46898	0.45393	ET128b			0.656979	0.624163	2.3125	2.32913
12857	0.45612	0.46661		128c	335.84	0.626979	0.690208	2.0201	2.11451
12932	0.44882	0.45908		129a	337.64	0.585625	0.635246	2.10021	2.18184
12934	0.44934	0.45727	ET129a			0.6	0.61889	2.20333	2.2178
12966	0.438	0.43558	ET129b			0.563333	0.54111	2.23	2.1967
12970	0.43561	0.44024		129b	338.85	0.428542	0.495691	2.0626	2.165
13010	0.44284	0.44951		130a	339.98	0.769375	0.849164	2.20969	2.2901
13015	0.44725	0.44294	ET130a			0.793333	0.782223	2.32333	2.3011
13049	0.44019	0.44686		130b	341.78	0.6875	0.725625	1.86813	1.91289
13051	0.44059	0.44521	ET130b			0.770625	0.773122	1.94125	1.99104
13101	0.44588	0.45662	ET131a			0.705	0.72	1.9	1.935
13102	0.44583	0.45701		131a	344.41	0.670625	0.729445	1.80042	1.90768
13133	0.46689	0.45234	ET131b			0.713333	0.741112	2.08333	2.06167
13141	0.45507	0.46392		131b	345.71	0.685833	0.734684	1.66958	1.74736
13165	0.43239	0.43803		131c		0.835	0.846665	2.25	2.2683
13167	0.43337	0.43742	ET131c			0.811875	0.830521	2.25125	2.26403
13217	0.4637	0.47628		132a	347.68	0.843958	0.880313	1.74479	1.86465
13218	0.46379	0.47484	ET132a			0.846667	0.87	1.80333	1.87663
13252	0.45599	0.45403	ET132b			0.666667	0.68333	1.8	1.8011
13256	0.45377	0.46313		132b	348.88	0.667083	0.720142	1.72208	1.81184
13294	0.42783	0.43089		133a		0.925	0.938335	2.115	2.12
13298	0.4286	0.42629	ET133a			0.959167	0.952358	2.22083	2.22628
13332	0.44623	0.45405		133b	351.77	0.655	0.764722	1.68417	1.92469
13334	0.44714	0.45205	ET133b			0.74	0.795553	1.86333	1.8989
13371	0.43811	0.44296		134a	353.07	0.973542	0.941321	1.79521	1.8733
13377	0.44324	0.43663	ET134a			1	0.996685	1.9	1.93335
13416	0.45103	0.44173	ET134b			1.01	1.00835	1.73	1.73665
13425	0.44188	0.44719		134b	355.29	1.015	1.00002	1.69125	1.78081
13500	0.46569	0.48028	ET135a			0.853125	0.836249	1.88813	1.84438
13501	0.4655	0.48128		135a	358.29	0.84375	0.848747	1.79375	1.84625
13534	0.46001	0.44763	ET135b			1.15	1.06835	1.85	1.81
13541	0.45307	0.46079		135b	359.59	0.634375	0.665419	1.50875	1.57253
13589	0.44991	0.45242	ET136a			1.19	1.15249	1.9625	1.92378
13594	0.44937	0.46267		136a	361.54	0.97375	1.01501	1.64187	1.76039
13620	0.46627	0.46857	ET136b			1.325	1.3117	2.005	1.9933
13635	0.44945	0.4627		136b	362.57	1.11312	1.14586	1.65938	1.71583
13705	0.45066	0.45615	ET137a			1.655	1.66039	1.95687	1.96081
13708	0.44921	0.45969		137a	365.07	1.56375	1.55789	1.855	1.91456
13730	0.43151	0.44097		137b		1.695	1.63375	2.22375	2.15125
13740	0.43876	0.43092	ET137b			1.59375	1.61086	2.18625	2.18919
13761	0.41356	0.41185			367.83	1.56625	1.58248	2.36625	2.30709
13820	0.43042	0.43034	ET138a			1.01875	1.1683	1.77375	1.81543
13825	0.42951	0.4344		138a		1.11625	1.22914	1.59125	1.57585
13843	0.40117	0.40049			371.83	1.13025	1.07022	2.1115	1.93861
13888	0.43518	0.42254			372.79	1.08104	0.994787	1.675	1.64688
13901	0.45524	0.46574		139a	373.04	0.899167	0.990625	1.09563	1.17517
13908	0.46385	0.45227	ET139a			1.22063	1.13586	1.18687	1.1756
13992	0.45926	0.47257		140a	375.54	1.2125	1.22104	1.0975	1.20601
13993	0.45935	0.47182	ET140a			1.18188	1.15021	1.21375	1.20541
14025	0.45694	0.44614	ET140b			1.45437	1.40021	1.74063	1.53685
14031	0.45055	0.45416		140b	377.09	0.974375	1.06435	1.50188	1.56977
14064	0.43466	0.43768		1407		1.52687	1.46833	1.77625	1.635
14070	0.43853	0.43336	ET1407			1.335	1.33335	1.62	1.5983
14108	0.44448	0.4502		1411	379.28	1.31313	1.32941	1.2925	1.39083
14111	0.446	0.44627	ET1411			1.365	1.3367	1.44	1.405
14146	0.42723	0.43029	ET1414			1.38	1.3483	2.04	1.97
14189	0.42279	0.42331	ET1418			1.12375	1.13979	1.80563	1.82729
14229	0.4386	0.44101	ET1422			1.2	1.2133	1.64	1.645
14269	0.44959	0.44324	ET1426			1.35563	1.29872	1.4725	1.40649
14275	0.44375	0.45062		1427	383.6	1.13062	1.18669	1.23562	1.40581
14304	0.44314	0.44814		1430	384.65	1.31563	1.32268	1.16437	1.24919
14310	0.44915	0.4411	ET1431			1.49438	1.46833	1.3	1.26024
14346	0.45898	0.47023		1434		1.21812	1.25392	1.28937	1.25101
14347	0.45929	0.47006	ET1434			1.265	1.2883	1.25	1.3083
14386	0.45785	0.45774	ET1438			1.1775	1.21042	1.12875	1.24539
14390	0.45579	0.46485		1439	386.9	1.18437	1.20435	1.09187	1.26685
14430	0.45926	0.45218	ET1443			1.57062	1.52625	1.185	1.29101
14436	0.45241	0.46225		1443	388.1	1.36688	1.31976	1.13437	1.21148
14461	0.44413	0.45333		1446		1.5725	1.52795	1.33937	1.39124
14466	0.44832	0.44674	ET1446			1.50625	1.4331	1.38375	1.41752
14506	0.43334	0.43734	ET1450	1450	391.18	1.0275	1.07498	1.05875	1.1117
14547	0.44093	0.44007	ET1454			1.58125	1.63626	1.32313	1.30997
14550	0.4392	0.44307		1455	392.83	1.52625	1.57334	1.1475	1.2175
14589	0.43301	0.43633	ET1458	1458	394.38	1.43813	1.49709	1.1075	1.13377
14626	0.43895	0.44254	ET1462			1.64562	1.62373	1.52687	1.43586
14628	0.43853	0.44473		1462		1.58	1.59	1.3	1.35835
14668	0.42632	0.42374	ET1466			1.39	1.40665	1.52	1.55835
14677	0.42168	0.42606		1467		1.27	1.305	1.32	1.34335
14703	0.46186	0.47235		147a		1.27	1.25335	1.435	1.455
14708	0.46787	0.46164	ET147a			1.23	1.2083	1.41	1.43835
14744	0.45837	0.47105		147b		1.42375	1.39316	1.49313	1.41562
14745	0.4584	0.47077	ET147b			1.395	1.38335	1.395	1.35835
14777	0.42538	0.42003			399.78	1.27687	1.21979	1.85688	1.75774
14826	0.47372	0.45644	ET148a			1.36333	1.28557	1.35333	1.25557
14835	0.46195	0.47707		148a	401.3	0.93125	0.972709	0.86375	0.89083	U1337 revised mcd	U1337 d13C	U1337 d13C 3pt smooth	U1337 d18O	U1337 d18O 3pt smooth
14910	0.45172	0.45964		149a	404.69	1.13219	1.15768	1.08156	1.20055		1.43067	1.35387	1.17528	1.25577
14914	0.45402	0.45193	ET149a			1.20375	1.24021	1.18781	1.16951		1.4098	1.41054	1.2682	1.3271
14946	0.44931	0.45427	ET149b			1.3825	1.3508	1.275	1.28832		1.1966	1.16522	1.2814	1.17622
14949	0.44817	0.45879		149b	405.69	1.24687	1.3158	1.06625	1.22737	336.66	1.16562	1.23415	0.956575	1.1984
15026	0.4318	0.43684		150		1.24969	1.2468	1.48562	1.4458		1.3312	1.3659	1.3282	1.4356
15030	0.43435	0.43334	ET150			1.2125	1.23628	1.37344	1.5007		1.2612	1.3343	1.2834	1.40882
15079	0.4463	0.45632	ET151a			1.0075	1.14417	0.775	0.984178		1.4285	1.477	1.0685	1.12285
15080	0.44653	0.45644		151a	409.1	0.959688	1.15104	0.715938	0.971359	339.35	1.43025	1.456	1.05875	1.12928
15116	0.45555	0.45817	ET151b			1.315	1.28998	1.605	1.47915		1.4615	1.46835	1.234	1.30015
15119	0.45396	0.46362		151b	410.1	1.16396	1.28222	1.22021	1.40791	339.96	1.34481	1.43304	1.13846	1.34068
15194	0.46303	0.47709		152a	412.37	0.812708	1.02073	0.780208	0.962921	341.17	0.9182	1.15138	0.8356	1.0181
15200	0.46738	0.45705	ET152a			1.04679	1.11946	0.972875	0.998587		1.22533	1.13803	1.20167	1.11123
15234	0.45206	0.46219	ET152b	152b	413.07	1.22188	1.24965	1.44687	1.54833	341.97	1.14186	1.18814	1.067	1.1759
15285	0.44591	0.4547	ET153a			1.435	1.53613	1.28333	1.41333		1.28714	1.26226	1.14143	1.22267
15286	0.44587	0.45546		153a	413.97	1.43	1.53788	1.26198	1.39969	347.72	1.27683	1.25453	1.10549	1.20377
15320	0.45668	0.45001	ET153b			1.606	1.5867	1.34	1.4127		1.4425	1.44752	1.3425	1.35498
15325	0.45257	0.46158		153b	414.87	1.44396	1.48594	1.21583	1.26938	343.72	1.45585	1.39203	1.07138	1.23607
15399	0.4444	0.44765	ET154			1.64458	1.60503	1.64875	1.6393		1.4951	1.30878	1.10865	1.10584
15402	0.4434	0.451		154		1.54542	1.53545	1.66437	1.59879	345.91	1.07833	1.27947	1.05083	1.13072
15403	0.44241	0.45009				1.48	1.50335	1.565	1.62165		1.12	1.2889	1.10333	1.1667
15440	0.43801	0.44166		155a	419.07	1.3275	1.3884	1.16833	1.22542		1.62833	1.65177	1.83767	1.8261
15445	0.44079	0.4357	ET155a			1.61	1.62	1.525	1.53585		1.72933	1.70074	1.79588	1.72212
15478	0.46185	0.47505		155b		1.255	1.30335	1.295	1.33165	348.52	1.47625	1.52792	1.1915	1.21703
15482	0.46491	0.46648	ET155b			1.398	1.3867	1.506	1.44398		1.611	1.48047	1.191	1.16477
15516	0.44337	0.44815	ET155c			1.215	1.285	1.145	1.205		1.37657	1.42779	1.47125	1.48436
15518	0.44273	0.45059		155c	420.96	1.04719	1.23239	1.04406	1.19469		1.44467	1.45837	1.515	1.51043
15565	0.46309	0.46396	ET156a			1.375	1.35039	1.19312	1.25333		0.862	0.9159	0.829	0.895567
15570	0.45982	0.47521		156a	423.94	0.86225	0.985669	0.701875	0.866625		0.713375	0.758271	0.560937	0.67243
15600	0.47792	0.46343	ET156b			1.55913	1.52029	1.29062	1.25788		0.85	0.754734	0.9506	0.7458
15610	0.45964	0.46991		156b	424.74	0.783083	1.04816	0.692167	0.928386	351.74	1.342	1.21754	1.538	1.37966
15634	0.43126	0.43853		156c		1.48969	1.47645	1.8725	1.73045		1.5855	1.52767	1.76775	1.74017
15685	0.46532	0.47992	ET157a	157a	426.96	1.31656	1.45514	1.08083	1.2498	353.54	1.315	1.30112	1.62	1.50337
15715	0.45246	0.44088	ET157b			1.66825	1.6395	1.56206	1.47378		1.5805	1.34125	1.43475	1.24836
15724	0.44329	0.45015		157b	427.87	1.59802	1.64885	1.40198	1.55895	354.13	1.31667	1.4122	1.29333	1.39777
15764	0.43218	0.43204		158a	429.11	1.41594	1.45889	1.38917	1.46188		1.57857	1.56001	1.68	1.64187
15769	0.4357	0.42971	ET158a			1.39333	1.4189	1.46667	1.47		1.54	1.5711	1.58667	1.59887
15800	0.44569	0.45459		158b	430.22	1.74667	1.71514	1.35802	1.42545	356.02	1.3399	1.36034	1.3851	1.4457
15802	0.44686	0.45319	ET158b			1.67	1.72335	1.385	1.445		1.285	1.365	1.435	1.475
15855	0.43299	0.43987			431.64	1.68281	1.71	1.4225	1.54507		1.695	1.66932	1.6975	1.68115
15887	0.44939	0.43997	ET159			1.74	1.7567	1.4725	1.5475		1.78075	1.58384	1.34172	1.35381
15894	0.44248	0.4515		159	432.56	1.56667	1.62619	1.23562	1.45101	357.64	1.34667	1.52553	1.45276	1.50714
15968	0.45834	0.47158		160a	435.5	1.33958	1.41656	1.25667	1.44108	359.32	1.497	1.5513	1.10033	1.2958
15973	0.46118	0.46059	ET160a								1.4425	1.4993	1.388	1.3902
15988	0.44209	0.45516		160b							1.5746	1.5455	1.6224	1.57872
16007	0.44865	0.45402	ET160b								1.58099	1.59117	1.8463	1.63465
16082	0.44601	0.45775		161							1.0825	1.11815	0.7175	0.78
16090	0.4505	0.44108	ET161								1.1015	1.07803	0.70125	0.747167
16128	0.42601	0.42745	ET1612								1.609	1.52818	1.4035	1.34845
16175	0.43483	0.44049		1617						362.67	1.43825	1.39567	1.126	1.10895
16176	0.43486	0.44027	ET1617								1.3655	1.37735	1.119	1.1352
16214	0.42544	0.42834		1621							1.12333	1.17575	1.311	1.2918
16216	0.42611	0.42718	ET1621								1.1372	1.17916	1.288	1.2817
16253	0.43724	0.44396		1625							1.2455	1.22745	1.20275	1.16498
16254	0.4372	0.44315	ET1625								1.239	1.2152	1.1845	1.17365
16294	0.42783	0.42926	ET1629								1.2785	1.21645	1.348	1.39565
16297	0.42729	0.42999		1629							1.21214	1.21593	1.53753	1.38447
16336	0.45789	0.44935	ET1633								0.877	0.97367	0.890286	0.94533
16341	0.45365	0.45941		1634						365.77	1.012	0.995827	0.944	0.966172
16368	0.44564	0.45525		1636							0.9775	1.0426	0.99925	1.13005
16373	0.44959	0.44699	ET1637								1.11875	1.08485	1.33488	1.23443
16416	0.44113	0.44801		1641							1.08871	1.07246	1.09986	1.14547
16418	0.44169	0.44612	ET1641								1.03757	1.06969	1.14729	1.14536
16453	0.46014	0.46001	ET1645								0.793571	0.938617	0.711143	0.821381
16457	0.45713	0.46682		1645							0.8596	0.984204	0.721	0.837936
16489	0.43583	0.43239		1649							1.16133	1.1593	1.20567	1.19853
16492	0.43747	0.43229	ET1649								1.18933	1.1563	1.15367	1.15723
16534	0.43725	0.44017		1653							1.292	1.241	1.02017	1.01145
16538	0.43963	0.43628	ET1653								1.2064	1.1768	1.0414	1.0106
16572	0.42882	0.43133	ET1657	1657							1.25896	1.28839	1.10215	1.12539
16609	0.43335	0.43579		1660							1.3289	1.32678	1.53055	1.52234
16613	0.43597	0.43314	ET1661								1.3002	1.33514	1.5486	1.5314
16652	0.44183	0.44659		1665							1.00467	0.984223	1.34833	1.3143
16655	0.44338	0.44422	ET1665								0.996667	0.965553	1.30983	1.2768
16695	0.45273	0.45842	ET1669								0.76325	0.84675	1.2905	1.42522
16697	0.45201	0.46128		1669						370.86	0.86375	0.85025	1.4575	1.42708
16733	0.45467	0.44415	ET1673								0.8282	0.826	1.1614	1.1469
16741	0.44689	0.45705		1674							0.579	0.589266	1.0274	1.06152
16768	0.44914	0.45705		1676							0.7262	0.743334	1.1046	1.1914
16773	0.45446	0.45126	ET1677								0.7388	0.71653	1.1538	1.16532
16812	0.47047	0.48453		168a						373.43	0.787	0.770864	1.0256	1.0618
16813	0.47062	0.48448	ET168a								0.824656	0.777772	1.09129	1.06758
16853	0.451	0.45609	ET168b								0.5254	0.595068	1.0632	1.1653
16856	0.44973	0.4591		168b							0.41125	0.583791	0.949	1.16908
16894	0.44636	0.43839	ET169a								0.580217	0.604735	0.875946	1.01668
16901	0.43806	0.44351		169a							0.599	0.66073	1.1864	1.1109
16927	0.45053	0.46031		169b							0.9906	0.9516	1.4272	1.38084
16930	0.45207	0.4565	ET169b								0.975667	0.958557	1.54233	1.4481
17013	0.42951	0.42758	ET170								0.8275	0.837942	1.62283	1.6325
17016	0.42856	0.42928		170							0.85	0.863777	1.65833	1.637
17017	0.42756	0.42912								376.62	0.8575	0.872388	1.67017	1.6385
17092	0.444	0.44782	ET171								0.5848	0.674268	1.122	1.229
17095	0.44273	0.45133		171						378.52	0.5934	0.649628	0.875325	1.27265
17096	0.44179	0.4506									0.6256	0.65447	1.0086	1.2782
17177	0.45468	0.44262	ET172								0.757	0.75211	1.64833	1.558
17188	0.44953	0.46336		172							0.6125	0.691832	1.284	1.47198
17293	0.45461	0.44324	ET173								0.756042	0.727636	1.30917	1.26819
17301	0.45052	0.46221		173						382.46	0.339479	0.427986	0.993437	1.12594
17459	0.45147	0.44585	ET174								0.856667	0.74489	1.325	1.4028
17470	0.43652	0.44363		174							0.536142	0.616914	1.44803	1.66024
17546	0.46501	0.47771		175a							0.6645	0.669335	1.655	1.6165
17548	0.46582	0.47354	ET175a								0.768802	0.692072	1.70227	1.56793
17579	0.46807	0.45686	ET175b								0.400333	0.408553	1.26433	1.2319
17585	0.46195	0.47482		175b						389.25	0.379594	0.452781	1.14478	1.28189
17660	0.47313	0.4873		176a						390.65	0.00645833	0.103142	1.0962	1.19319
17665	0.47774	0.47148	ET176a								-0.025	0.122919	1.09625	1.24
17698	0.45595	0.46548	ET176b								0.53	0.531665	1.365	1.4067
17700	0.45552	0.46745		176b						391.05	0.535	0.555832	1.3625	1.4317
17750	0.44346	0.45016	ET177a								0.555	0.584584	1.36	1.41291
17752	0.44295	0.45161		177a							0.54	0.575	1.35875	1.405
17775	0.44444	0.45363		177b							0.524442	0.428805	1.67225	1.53013
17783	0.45387	0.44294	ET177b								0.26	0.454584	1.38	1.51041
17814	0.42702	0.43129		178a							0.541094	0.563174	1.42969	1.42377
17826	0.43713	0.43935	ET178a								0.612857	0.616667	1.56571	1.54903
17866	0.45437	0.46007	ET178b								0.657143	0.647616	1.51143	1.54571
17868	0.45333	0.46228		178b							0.619978	0.613858	1.56056	1.58103
17944	0.4644	0.47796		179a						393.68	0.46506	0.541534	1.52536	1.61108
17948	0.46672	0.46537	ET179a								0.593333	0.527777	1.6	1.55557
17981	0.4577	0.4642	ET179b								0.407143	0.39857	1.3	1.36286
17983	0.45729	0.46805		179b							0.355714	0.38619	1.28	1.35429
17984	0.45657	0.46805		179b						394.85	0.332464	0.379857	1.2755	1.35437

## Sheet: Table S2 info
This Supplemental Material accompanies
Holbourn, A., Kuhnt, W., Kochhann, K.G.D., Matsuzaki, K.M., and Andersen, N., 2022, Middle Miocene climate–carbon cycle dynamics:
Keys for understanding future trends on a warmer Earth?, in Aiello, I., Barron, J., and Ravelo, C., eds., Understanding the Monterey
Formation and Similar Biosiliceous Units across Space and Time: Geological Society of America Special Paper 556, https://doi.org/10.1130/2022.2556(05).
Supplemental Table S2: Tie points between U1337-U1338 benthic foraminiferal isotope records and ET and ET+0.3P target from Laskar et al. (2004).
