# Supplementary material
Source: publisher figshare collection journal article supplement (https://gsapubs.figshare.com/articles/dataset/_/19684242)

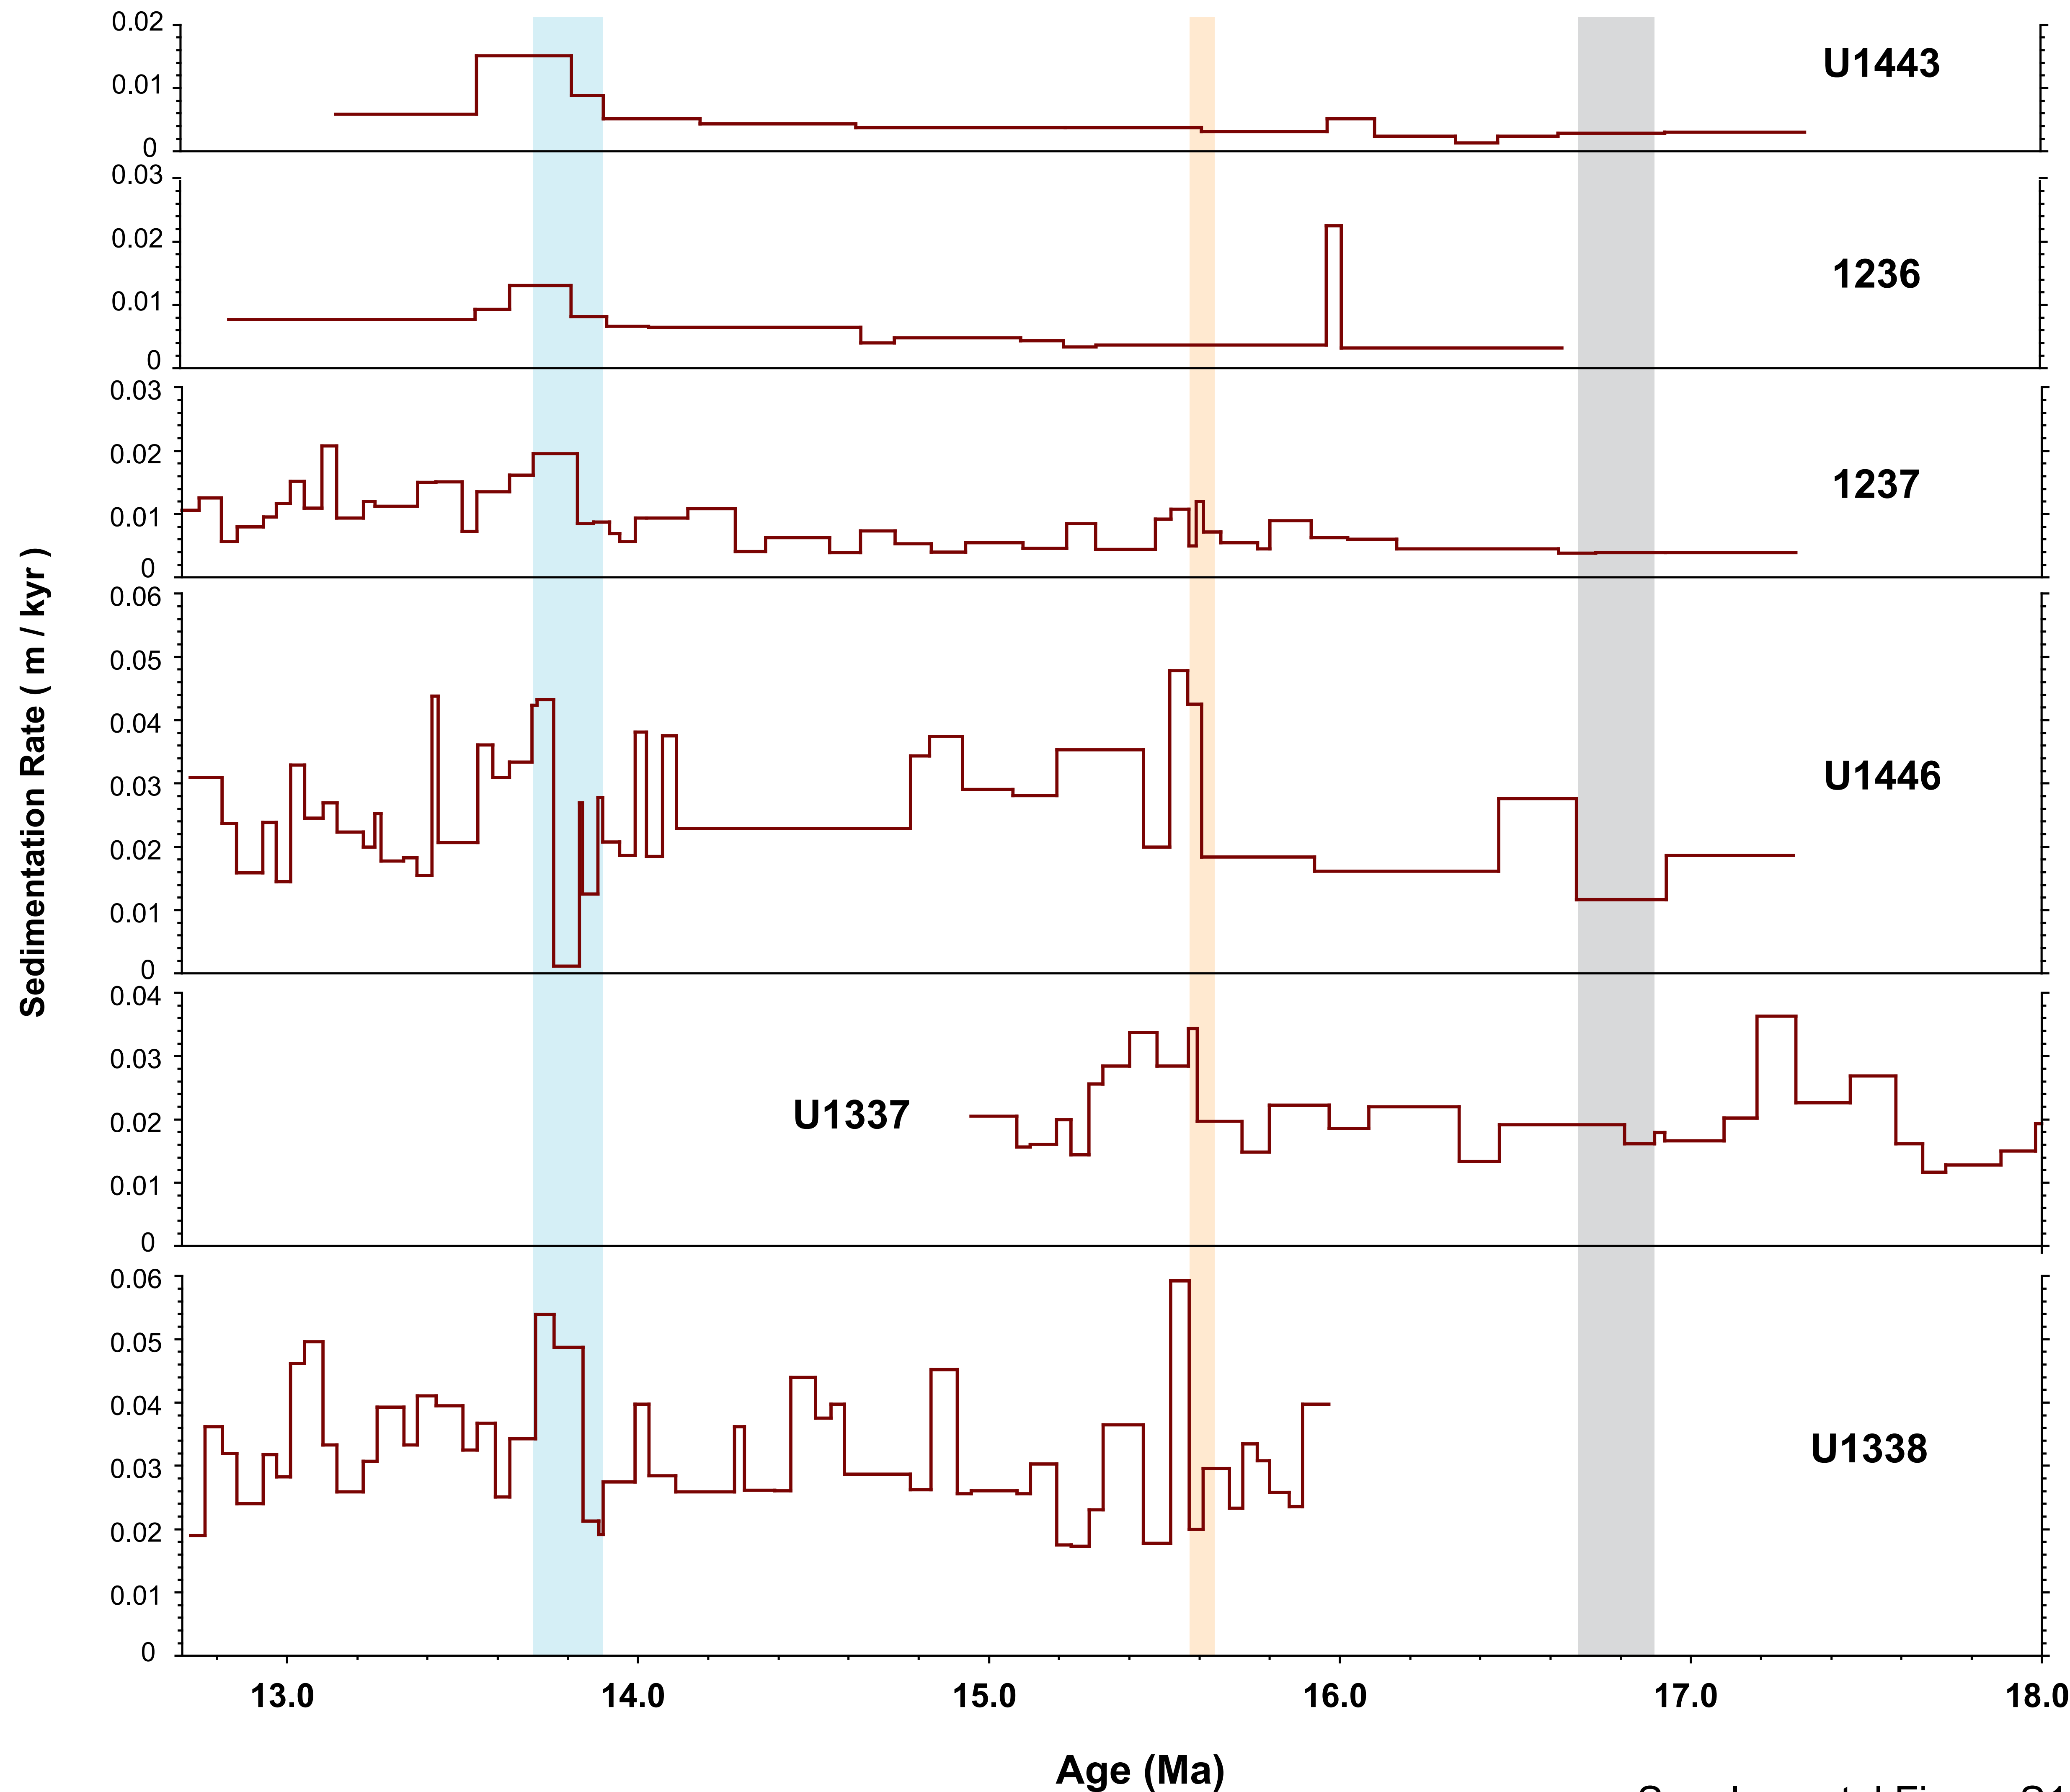

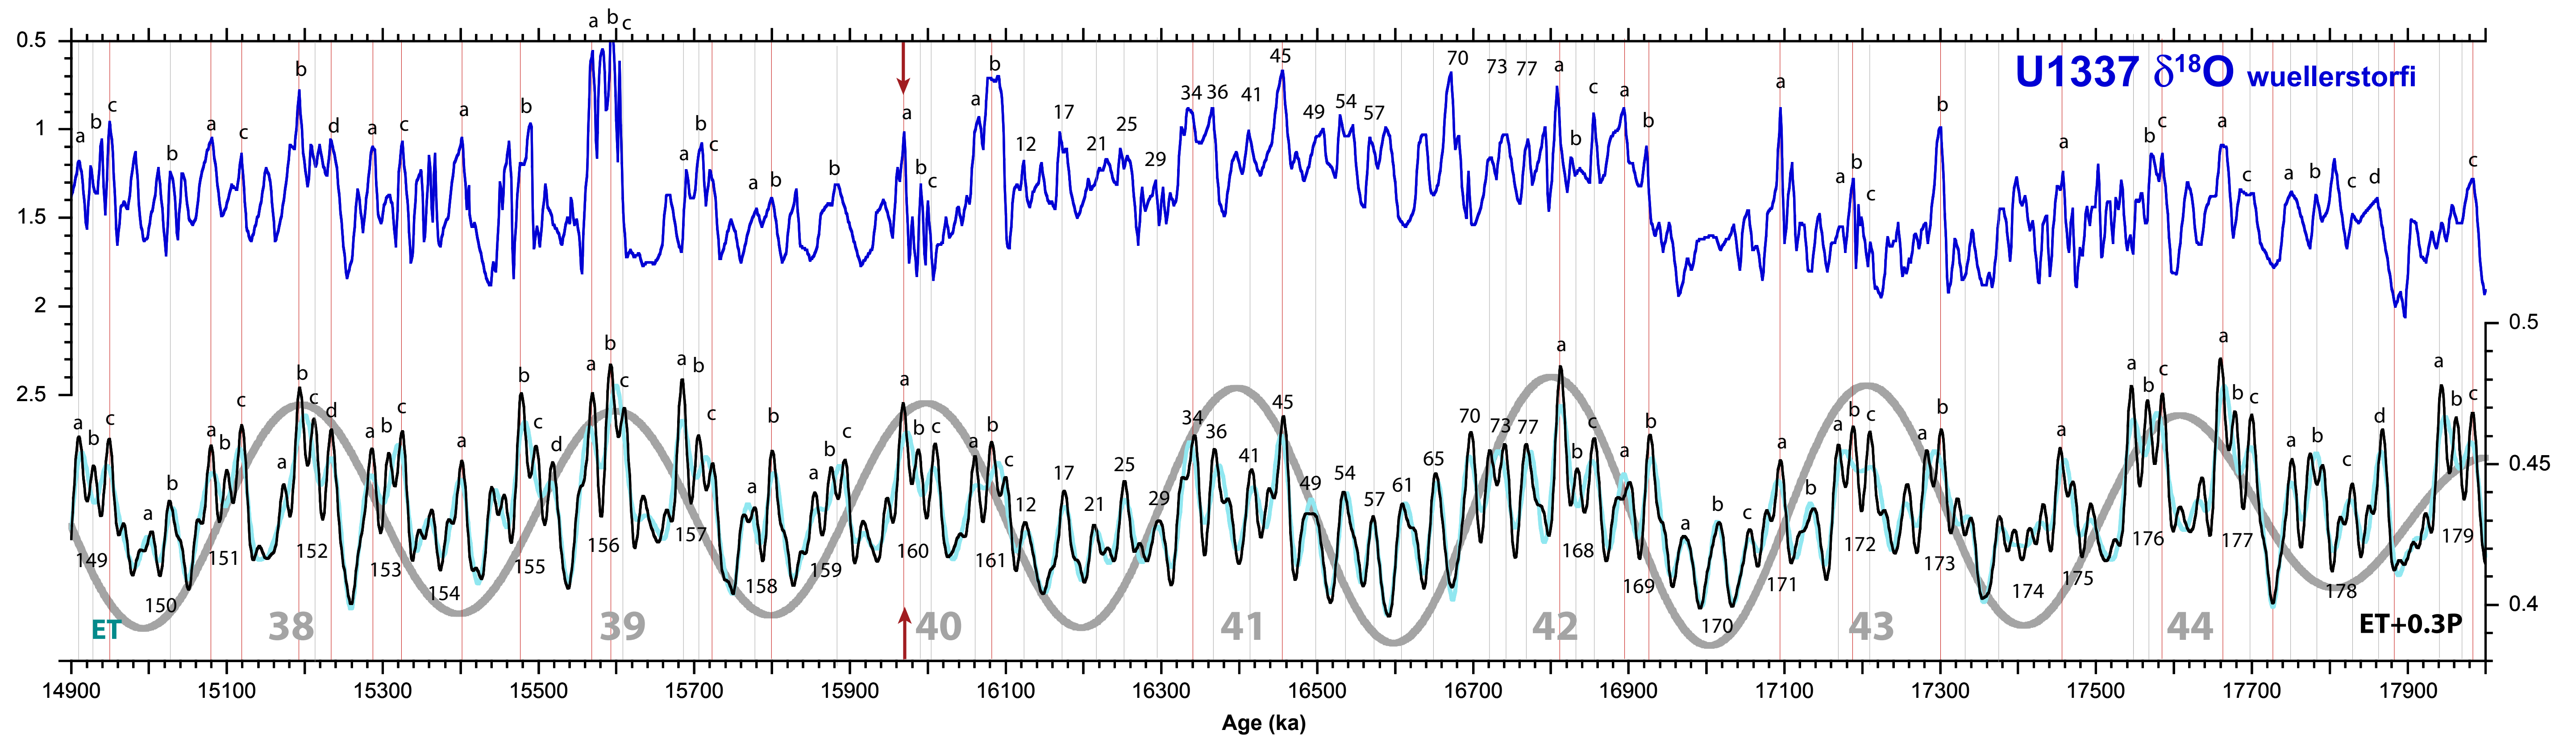

Supplemental Figure 2a

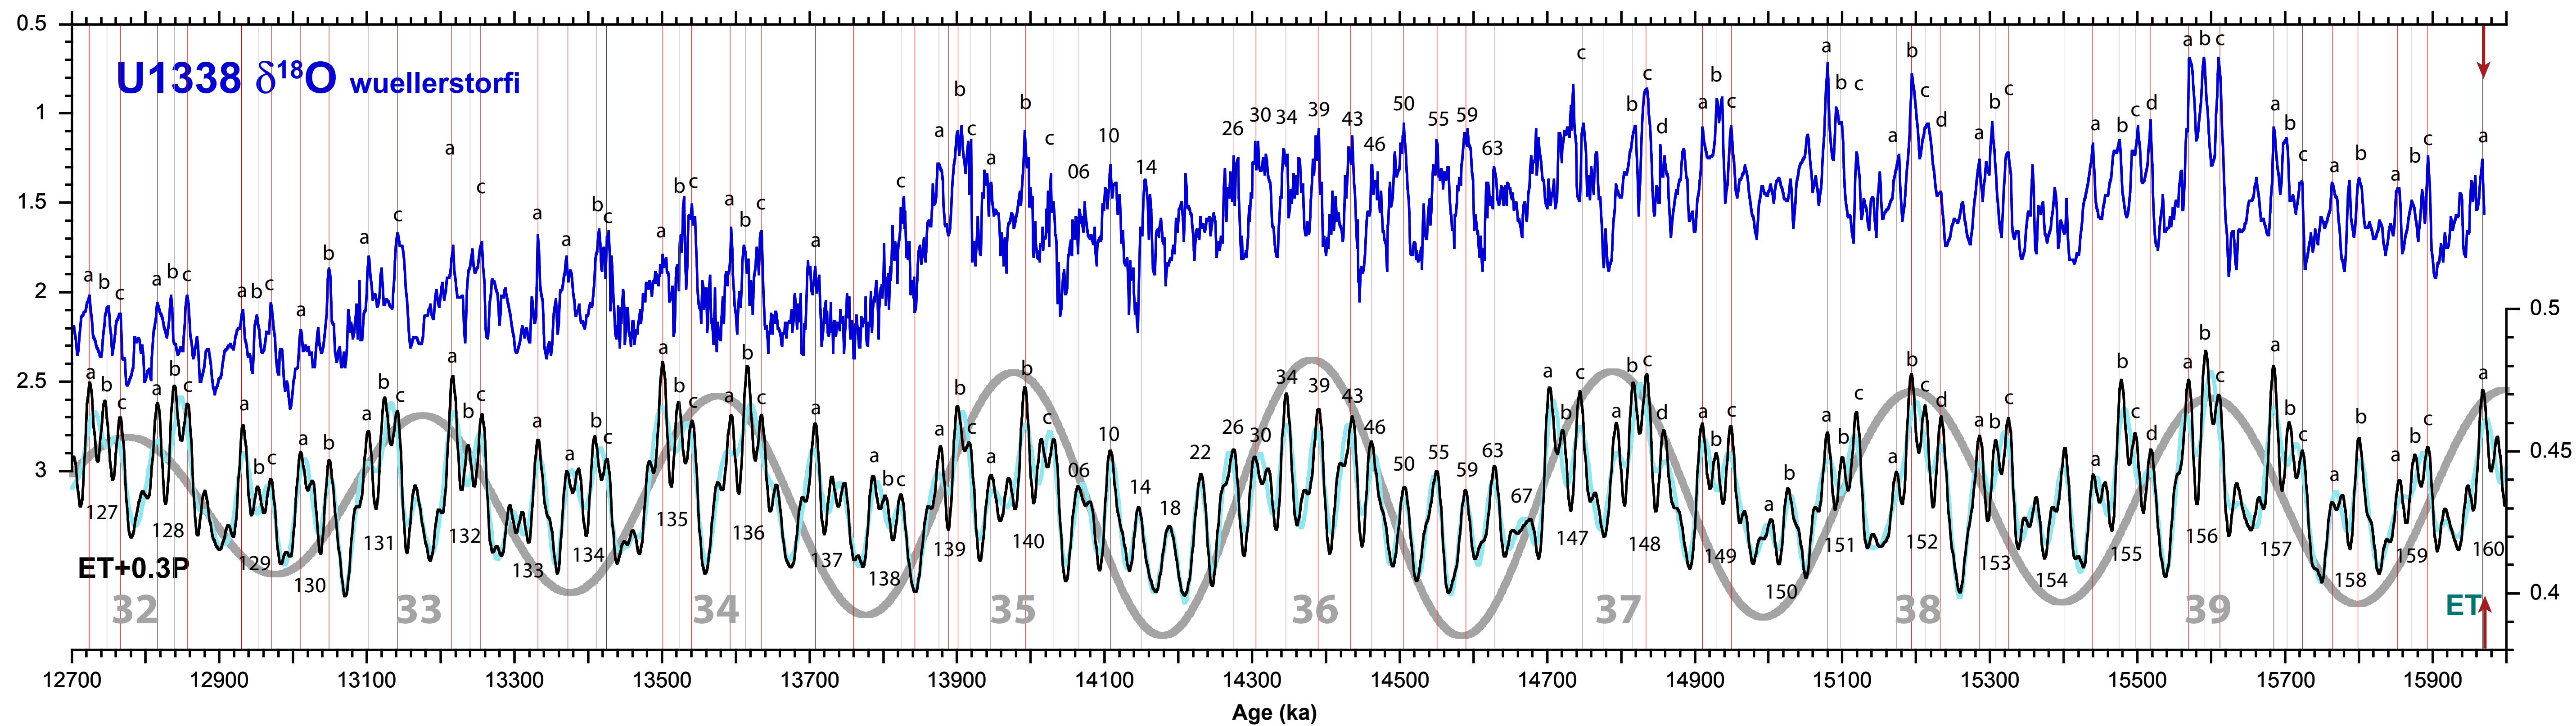

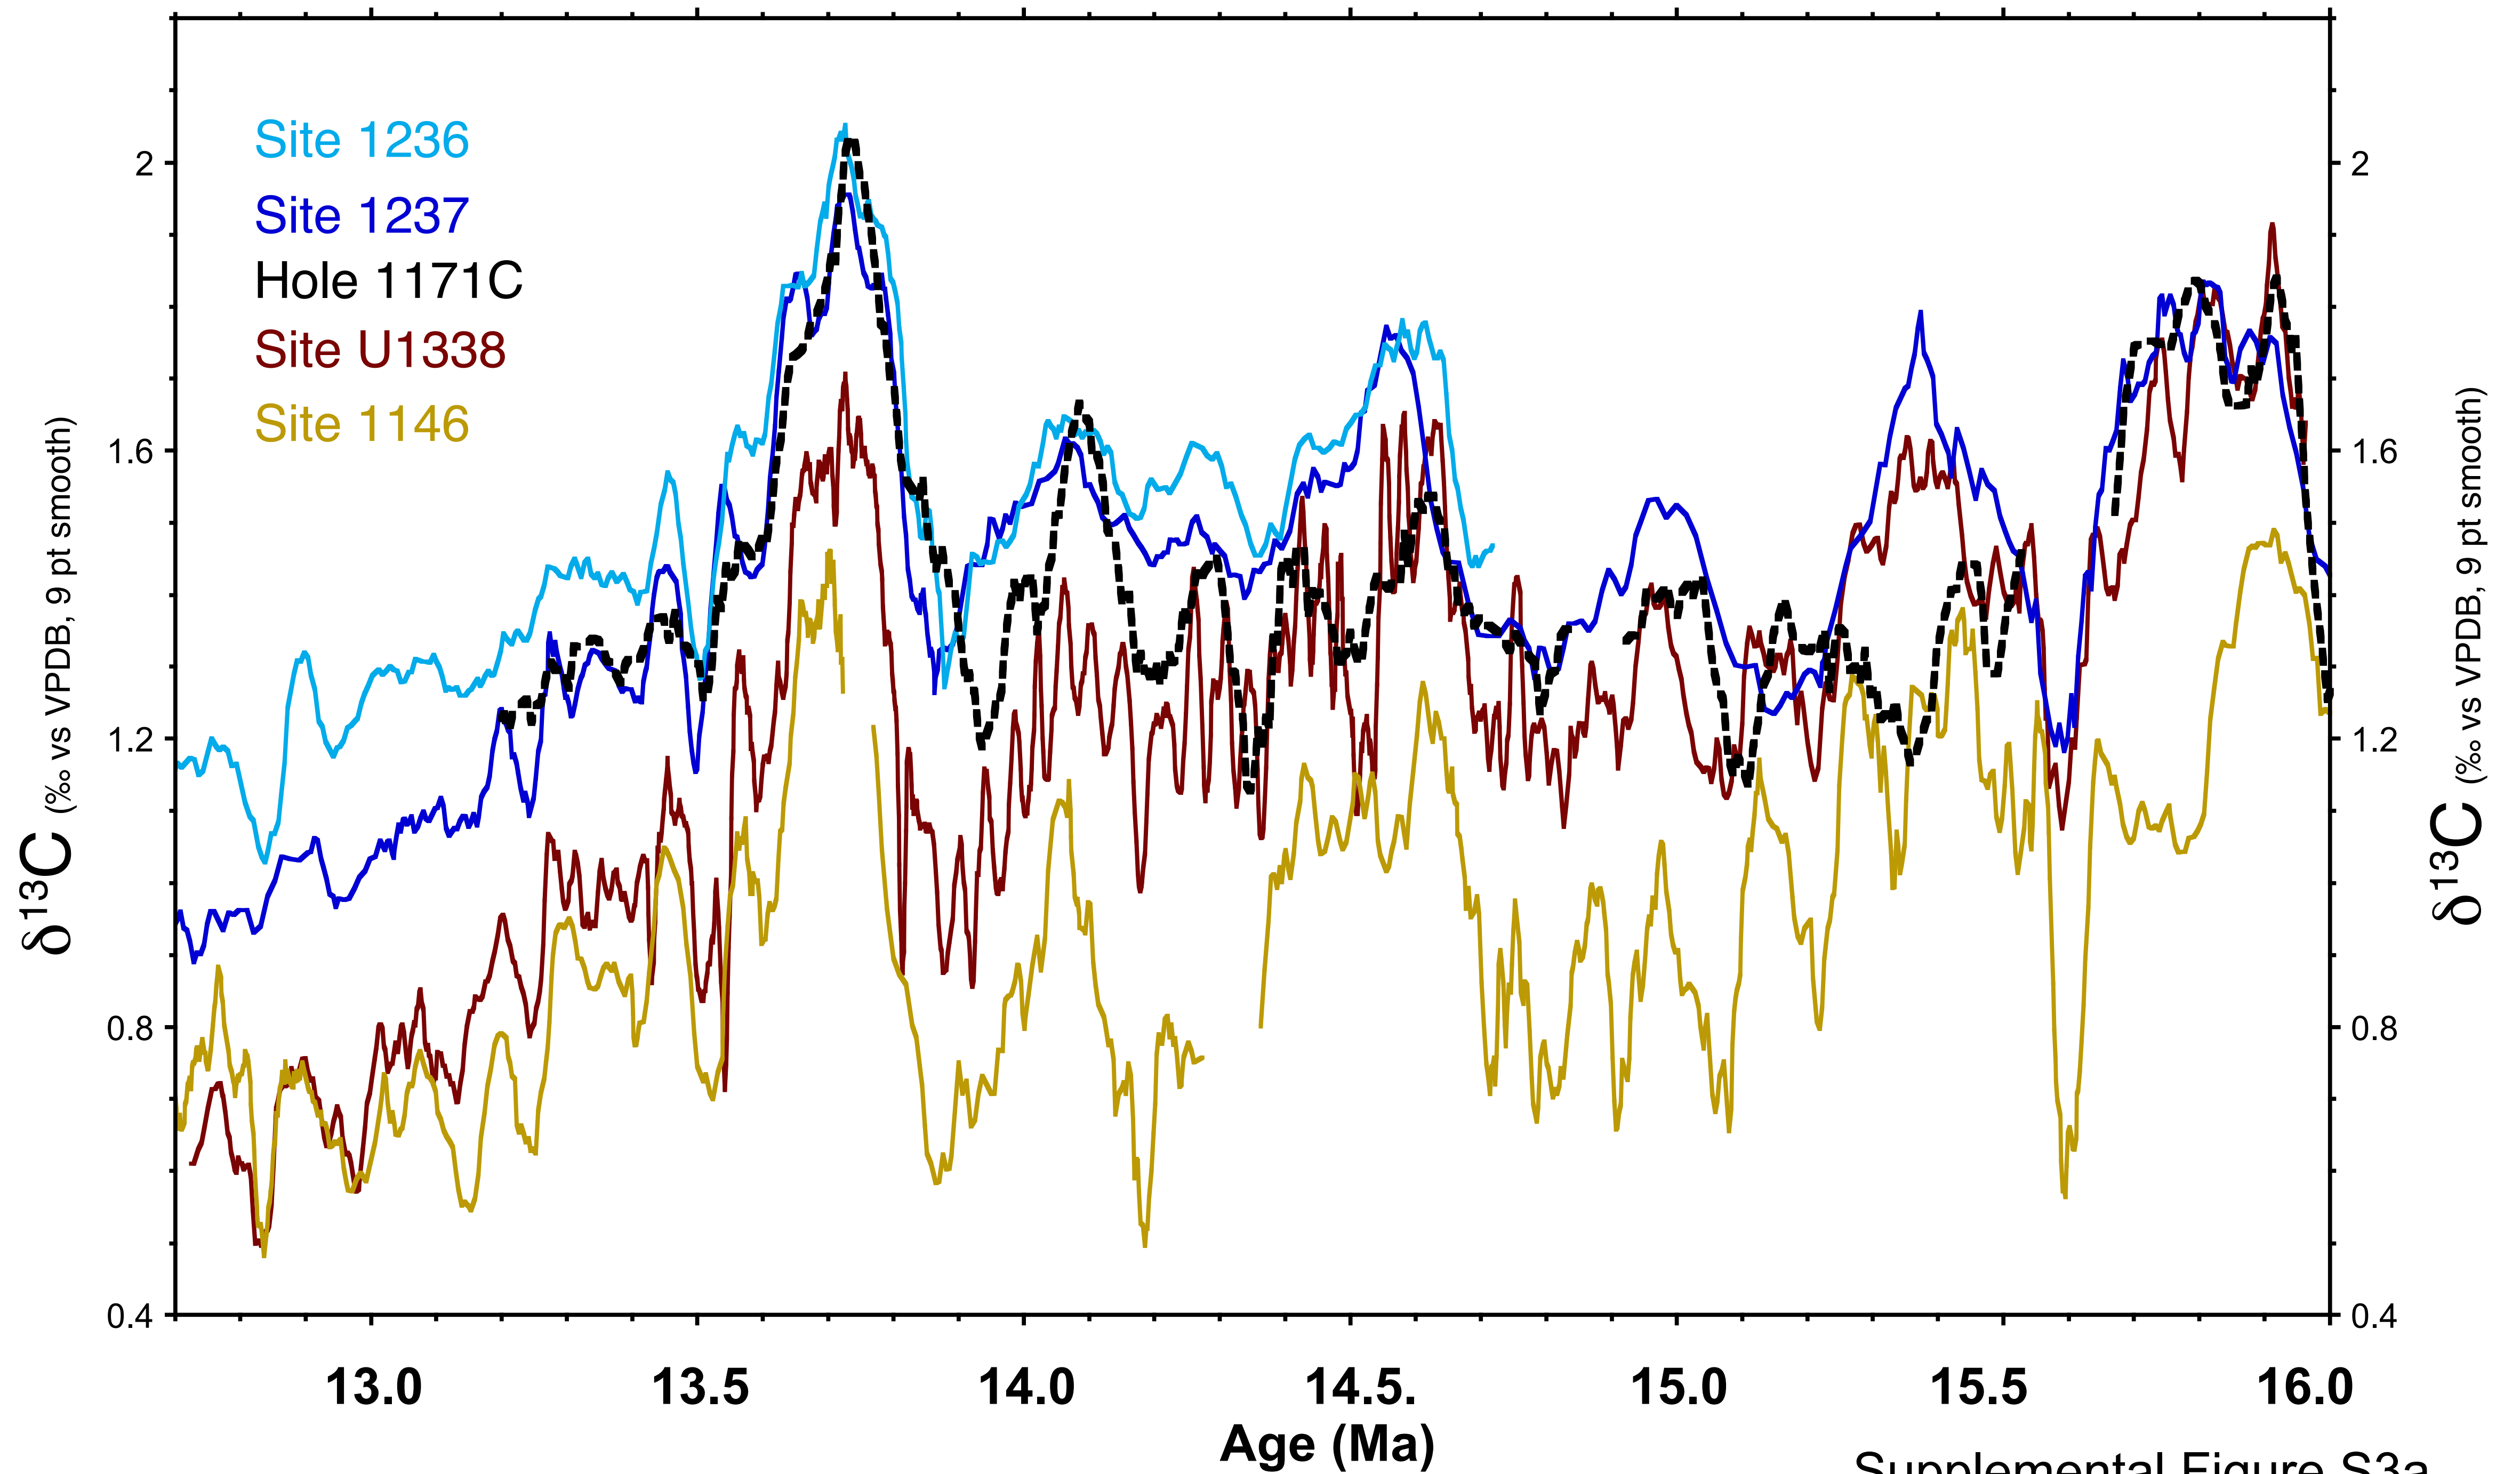

Supplemental Figure S3a



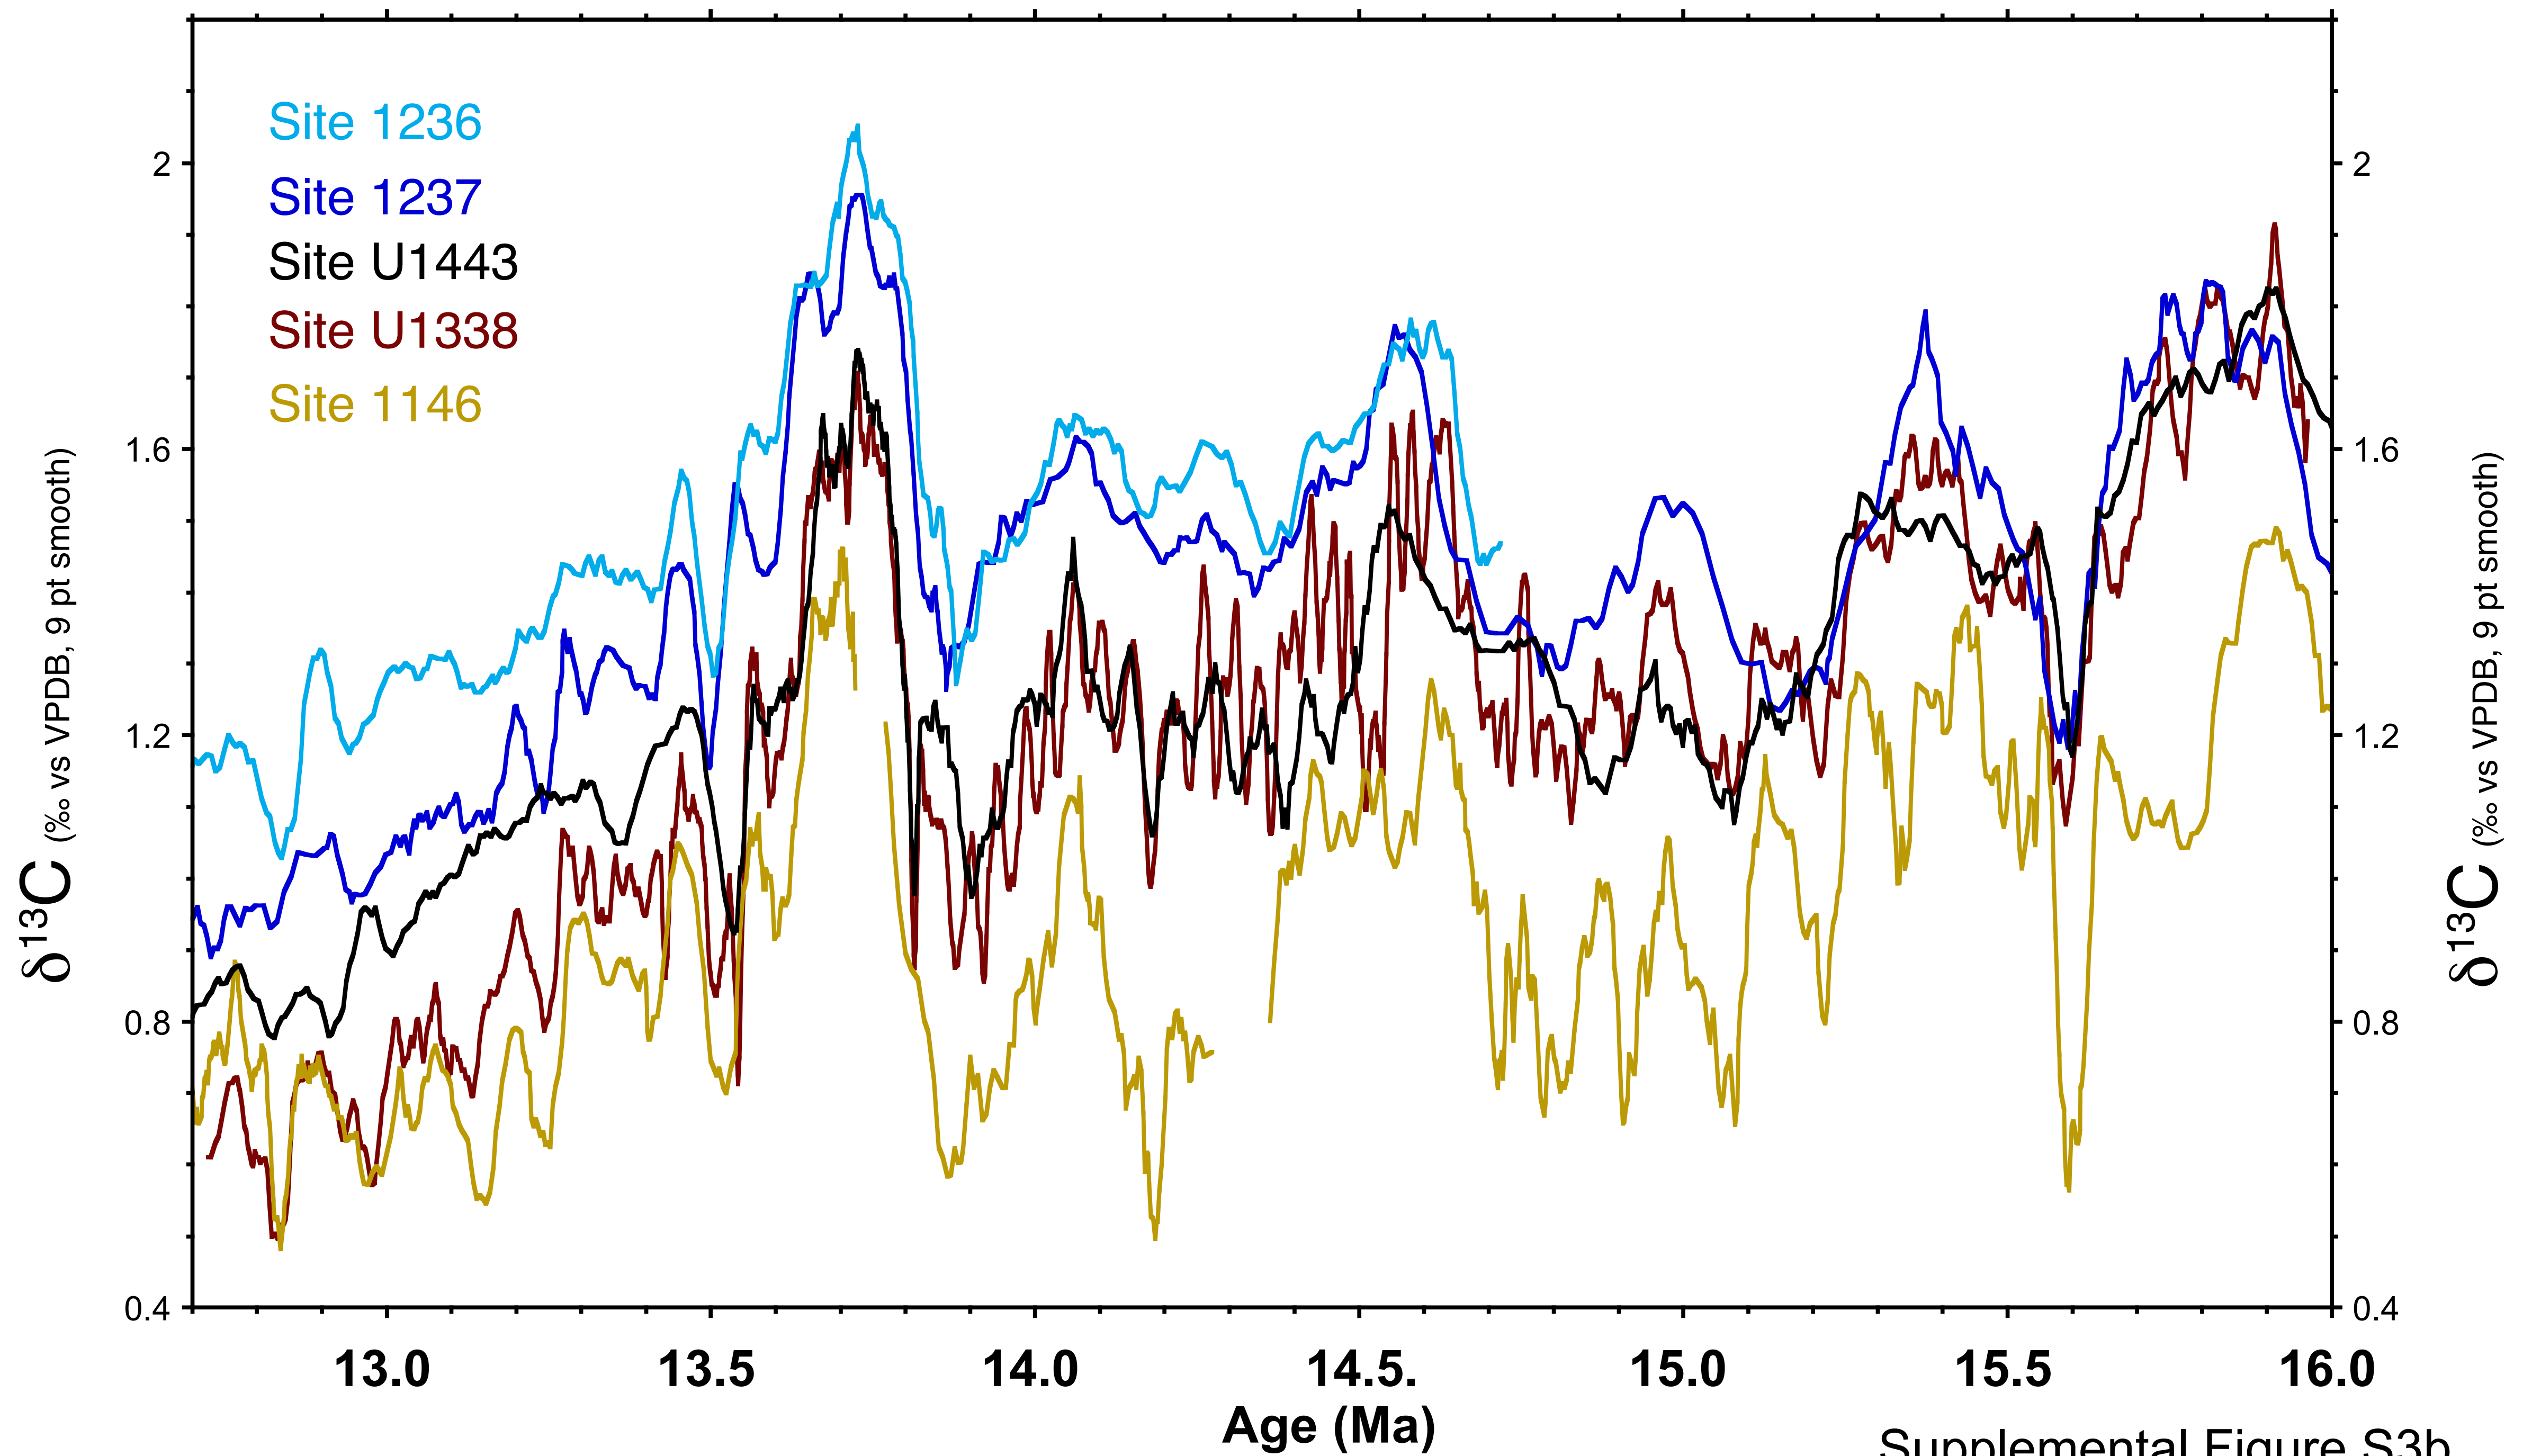

Supplemental Figure S3b

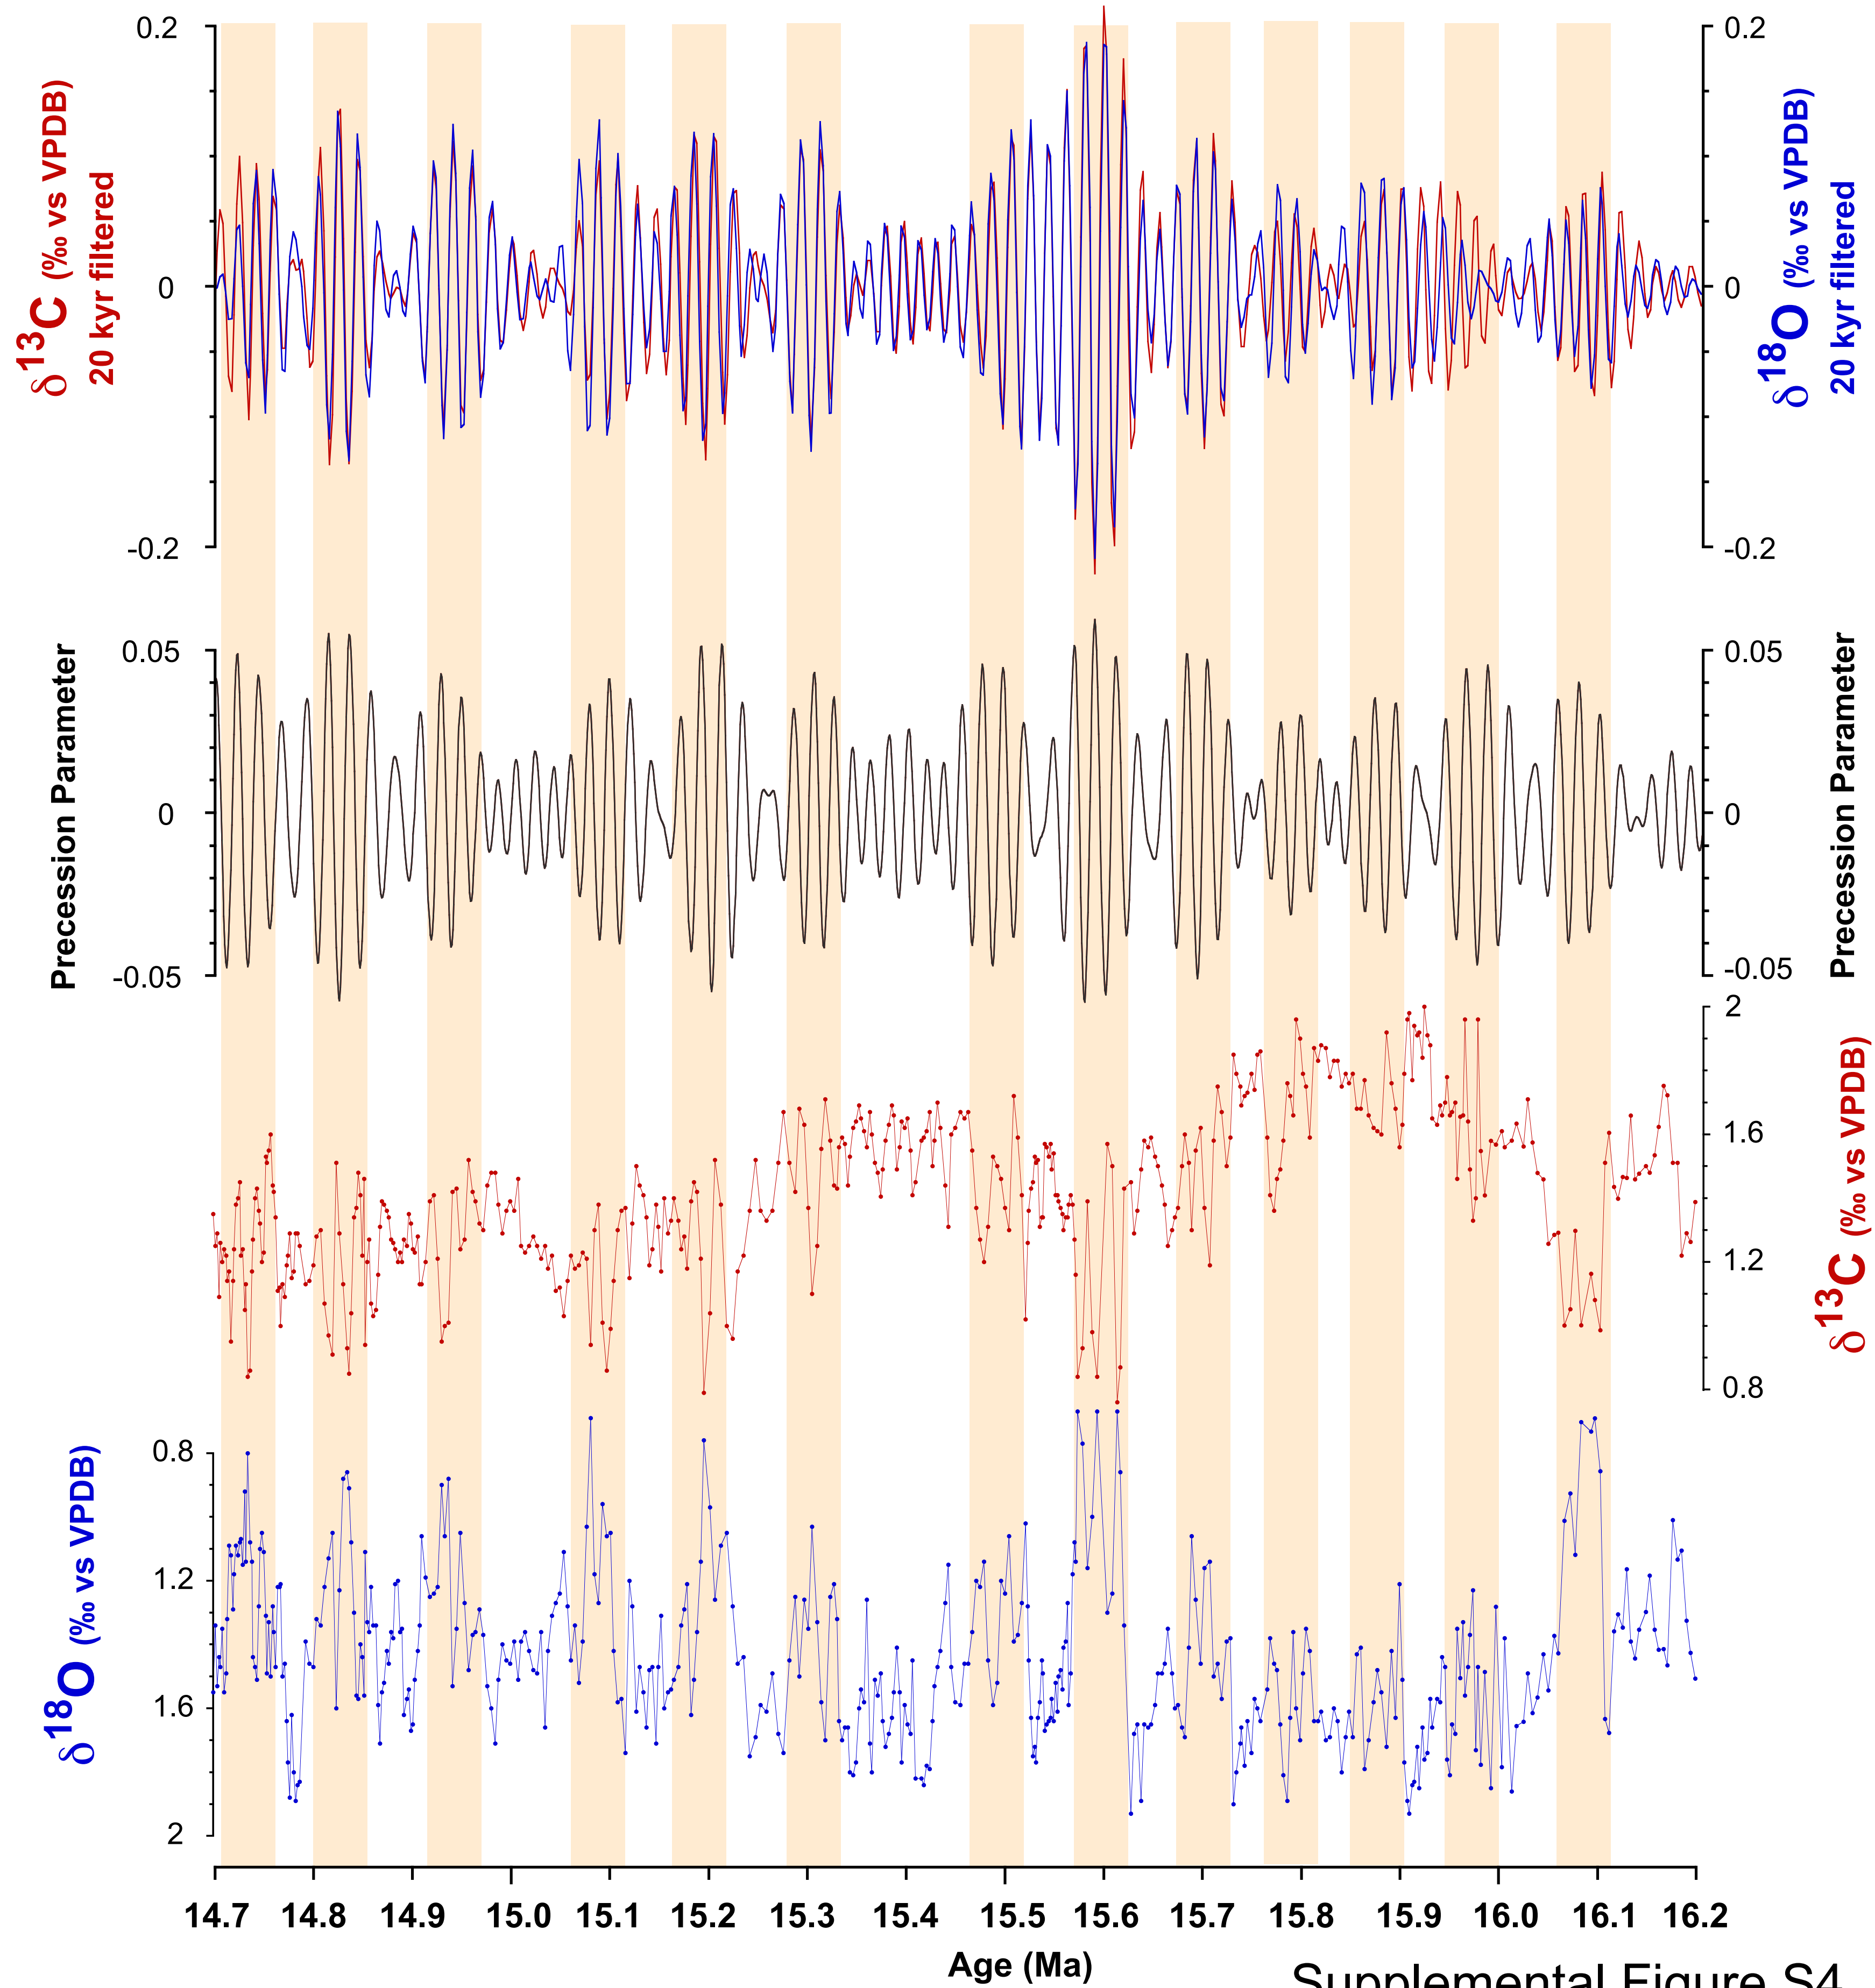

Supplemental Figure S4

Supplement: Supplementary file 1 [file 1]
